# Supplementary material
Source: HighWire-hosted journal article supplement (https://www.cmaj.ca/highwire/filestream/57762/field_highwire_adjunct_files/1/acupunct-lee-appendix_2.pdf)
Supplement: acupunct-lee-appendix_2.pdf [file acupunct-lee-appendix_2.pdf]

## Appendix 2 (as supplied by the authors): The search strategies

### MEDLINE (Ovid)

- 1 exp cerebrovascular disorders/
- 2 (stroke\$ or poststroke\$ or cva\$).tw.
- 3 (cerebrovascular\$ or cerebral vascular).tw.
- 4 (cerebral or cerebellar or brainstem or vertebrobasilar).tw.
- 5 (infarct\$ or ischemi\$ or thrombo\$ or apoplexy or emboli\$).tw.
- 6 4 and 5
- 7 (cerebral or intracerebral or intracranial or parenchymal).tw.
- 8 (brain or intraventricular or brainstem or cerebellar).tw.
- 9 (infratentorial or supratentorial).tw.
- 10 7 or 8 or 9
- 11 (haemorrhage or hemorrhage or haematoma or hematoma).tw.
- 12 (bleeding or aneurysm).tw.
- 13 11 or 12
- 14 10 and 13
- 15 1 or 2 or 3 or 6 or 14
- 16 acupuncture/
- 17 exp acupuncture therapy/
- 18 electroacupuncture/
- 19 meridians/
- 20 acupuncture points/
- 21 acupuncture\$.tw.
- 22 (electroacupuncture or electro- acupuncture or acupoint\$).tw.
- 23 ((meridian or non-meridian) adj10 point\$).tw.
- 24 or/16-23
- 25 15 and 24
- 26 limit 25 to human

### EMBASE (Ovid)

- 1 exp cerebrovascular disease/
- 2 (stroke\$ or poststroke\$ or cva\$).tw.
- 3 (cerebrovascular\$ or cerebral vascular).tw.
- 4 (cerebral or cerebellar or brainstem or vertebrobasilar).tw.
- 5 (infarct\$ or ischemi\$ or thrombo\$ or apoplexy or emboli\$).tw.
- 6 4 and 5
- 7 (cerebral or intracerebral or intracranial or parenchymal).tw.
- 8 (brain or intraventricular or brainstem or cerebellar).tw.
- 9 (infratentorial or supratentorial).tw.
- 10 7 or 8 or 9
- 11 (haemorrhage or hemorrhage or haematoma or hematoma).tw.
- 12 (bleeding or aneurysm).tw.
- 13 11 or 12
- 14 10 and 13
- 15 1 or 2 or 3 or 6 or 14
- 16 acupuncture/
- 17 electroacupuncture/

18 acupuncture\$.tw.  
 19 (electroacupuncture or electro- acupuncture or acupoint\$).tw.  
 20 ((meridian or non-meridian) adj10 point\$).tw.  
 21 or/16-20  
 22 15 and 21  
 23 limit 22 to human

### **PsycINFO (Ovid)**

1 MeSH descriptor cerebrovascular disorders explode all trees  
 2 (stroke\$ or poststroke\$ or cva\$).tw.  
 3 (cerebrovascular\$ or cerebral vascular).tw.  
 4 (cerebral or cerebellar or brainstem or vertebrobasilar).tw.  
 5 (infarct\$ or ischemi\$ or thrombo\$ or apoplexy or emboli\$).tw.  
 6 4 and 5  
 7 (cerebral or intracerebral or intracranial or parenchymal).tw.  
 8 (brain or intraventricular or brainstem or cerebellar).tw.  
 9 (infratentorial or supratentorial).tw.  
 10 7 or 8 or 9  
 11 (haemorrhage or hemorrhage or haematoma or hematoma).tw.  
 12 (bleeding or aneurysm).tw.  
 13 11 or 12  
 14 10 and 13  
 15 1 or 2 or 3 or 6 or 14  
 16 acupuncture/  
 17 acupuncture\$.tw.  
 18 (electroacupuncture or electro- acupuncture or acupoint\$).tw.  
 19 ((meridian or non-meridian) adj10 point\$).tw.  
 20 or/16-19  
 21 15 and 20  
 22 limit 21 to human

### **Cochrane (Wiley)**

1 exp cerebrovascular disorders/  
 2 (stroke\* or poststroke\* or cva\*):kw  
 3 (cerebrovascular\* or cerebral vascular):kw  
 4 (cerebral or cerebellar or brainstem or vertebrobasilar):kw  
 5 (infarct\* or ischemi\* or thrombo\* or apoplexy or emboli\*):kw  
 6 #4 and #5  
 7 (cerebral or intracerebral or intracranial or parenchymal):kw  
 8 (brain or intraventricular or brainstem or cerebellar):kw  
 9 (infratentorial or supratentorial):kw  
 10 #7 or #8 or #9  
 11 (haemorrhage or hemorrhage or haematoma or hematoma):kw  
 12 (bleeding or aneurysm):kw  
 13 #11 or #12  
 14 #10 and #13  
 15 #1 or #2 or #3 or #6 or #4  
 16 MeSH descriptor Acupuncture  
 17 MeSH descriptor acupuncture therapy explode all trees

- 18 MeSH descriptor electroacupuncture
- 19 MeSH descriptor meridians
- 20 acupuncture points/
- 21 acupuncture\*:kw
- 22 (electroacupuncture or electro- acupuncture or acupoint\*):kw
- 23 ((meridian or non-meridian) NEAR point\*):kw
- 24 #16 or #17 or #18 or #19 or #20 or #21 or #22
- 25 #15 and #24

### **CINAHL (Ebsco)**

- 1 (MH "Cerebrovascular Disorders+")
- 2 TX (stroke\* or poststroke\* or cva\*)
- 3 TX (cerebrovascular\* or cerebral vascular)
- 4 TX (cerebral or cerebellar or brainstem or vertebrobasilar)
- 5 TX (infarct\* or ischemi\* or thrombo\* or apoplexy or emboli\*)
- 6 S4 and S5
- 7 TX (cerebral or intracerebral or intracranial or parenchymal)
- 8 TX (brain or intraventricular or brainstem or cerebellar)
- 9 TX (infratentorial or supratentorial)
- 10 S7 or S8 or S9
- 11 TX (haemorrhage or hemorrhage or haematoma or hematoma)
- 12 TX (bleeding or aneurysm)
- 13 S11 or S12
- 14 S10 and S13
- 15 S1 or S2 or S3 or S6 or S14
- 16 (MH "Acupuncture")
- 17 (MH "electroacupuncture")
- 18 (MH "meridians")
- 19 (MH acupuncture points")
- 20 TX acupuncture\*.
- 21 TX (electroacupuncture or electro- acupuncture or acupoint\*)
- 22 TX (meridian N10 point\*)
- 23 TX (non-meridian N10 point\*)
- 24 S22 OR S23
- 25 S16 OR S17 OR S18 OR S19 OR S20 OR S21 OR S24
- 26 15 and 25

### **AMED (Ebsco)**

- 1 TX (stroke\* or poststroke\* or cva\*)
- 2 TX (cerebrovascular\* or cerebral vascular)
- 3 TX (cerebral or cerebellar or brainstem or vertebrobasilar)
- 4 TX (infarct\* or ischemi\* or thrombo\* or apoplexy or emboli\*)
- 5 S3 and S4
- 6 TX (cerebral or intracerebral or intracranial or parenchymal)
- 7 TX (brain or intraventricular or brainstem or cerebellar)
- 8 TX (infratentorial or supratentorial)
- 9 S6 or S7 or S8
- 10 TX (haemorrhage or hemorrhage or haematoma or hematoma)
- 11 TX (bleeding or aneurysm)

12 S10 or S11  
 13 S9 and S12  
 14 S1 or S2 or S5 or S13  
 15 TX acupuncture\*  
 16 TX (electroacupuncture or electro- acupuncture or acupoint\*)  
 17 TX (meridian N10 point\*)  
 18 TX (non-meridian N10 point\*)  
 19 S17 OR S18  
 20 S15 OR S16 OR S19  
 21 14 and 20

### **British Nursing Index (Ebsco)**

1 TX (stroke\* or poststroke\* or cva\*)  
 2 TX (cerebrovascular\* or cerebral vascular)  
 3 TX (cerebral or cerebellar or brainstem or vertebrobasilar)  
 4 TX (infarct\* or ischemi\* or thrombo\* or apoplexy or emboli\*)  
 5 S3 and S4  
 6 TX (cerebral or intracerebral or intracranial or parenchymal)  
 7 TX (brain or intraventricular or brainstem or cerebellar)  
 8 TX (infratentorial or supratentorial)  
 9 S6 or S7 or S8  
 10 TX (haemorrhage or hemorrhage or haematoma or hematoma)  
 11 TX (bleeding or aneurysm)  
 12 S10 or S11  
 13 S9 and S12  
 14 S1 or S2 or S5 or S13  
 15 TX acupuncture\*  
 16 TX (electroacupuncture or electro- acupuncture or acupoint\*)  
 17 TX (meridian N10 point\*)  
 18 TX (non-meridian N10 point\*)  
 19 S17 OR S18  
 20 S15 OR S16 OR S19  
 21 14 and 20
